# Supplementary material for: NAT10-mediated mRNA N4-acetylcytidine reprograms serine metabolism to drive leukaemogenesis and stemness in acute myeloid leukaemia
Source: PubMed Central journal article supplement — Nat Cell Biol. 2024 Nov 6;26(12):2168–82. doi: 10.1038/s41556-024-01548-y (PMC11628400; doi:10.1038/s41556-024-01548-y), 2024-11-06

### Extended Data Figure 3

Extended Data Fig. 3c

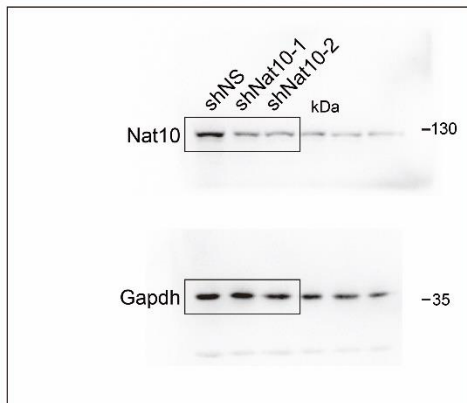

Extended Data Fig. 3e

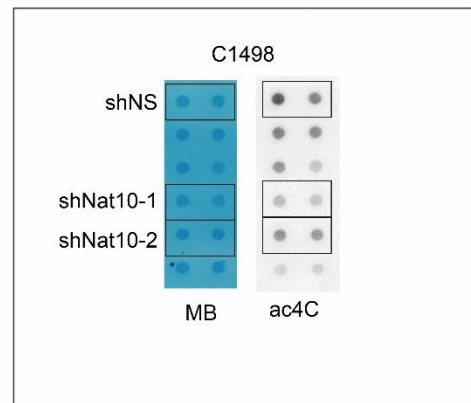

Extended Data Fig. 3f

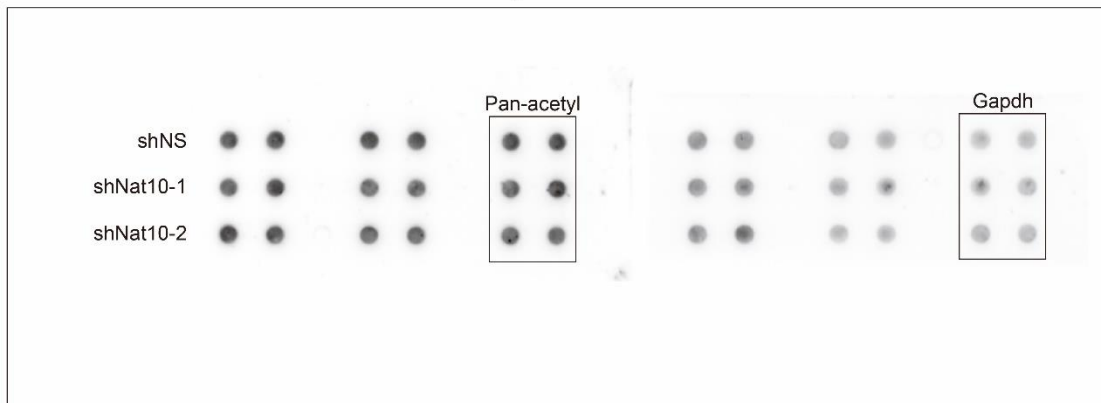

Extended Data Fig. 3h

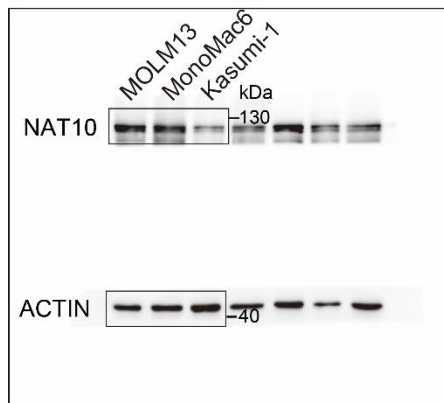

Extended Data Fig. 3i

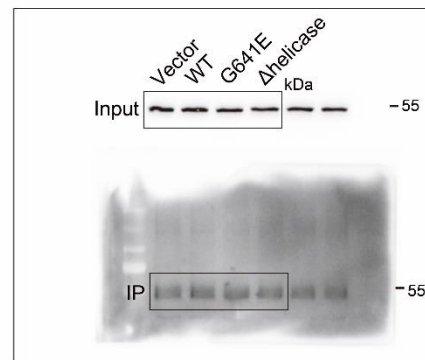

Supplement: 41556_2024_1548_MOESM26_ESM.pdf [file 41556_2024_1548_MOESM26_ESM.pdf]
