# Supplementary figures and images for: NAT10-mediated mRNA N4-acetylcytidine reprograms serine metabolism to drive leukaemogenesis and stemness in acute myeloid leukaemia
Source: PubMed Central journal article supplement — Nat Cell Biol. 2024 Nov 6;26(12):2168–82. doi: 10.1038/s41556-024-01548-y (PMC11628400; doi:10.1038/s41556-024-01548-y), 2024-11-06

**Figure 2**

Fig.2a

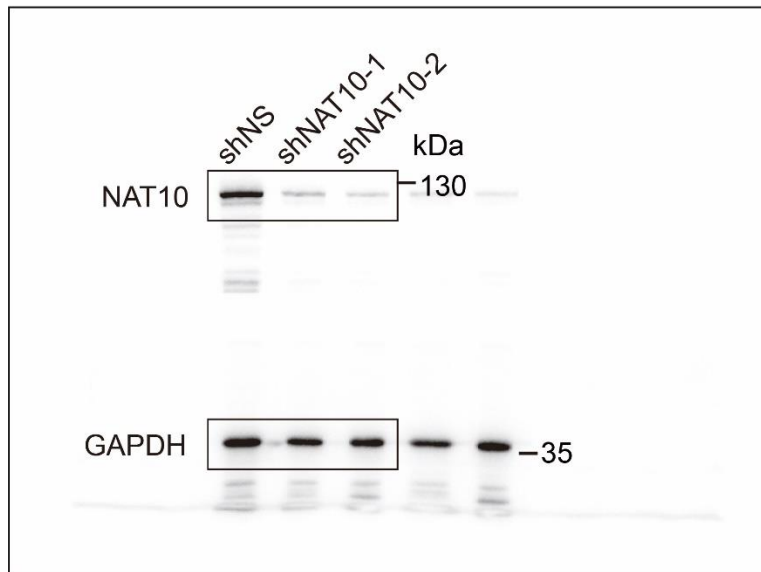

Supplement: 41556_2024_1548_MOESM10_ESM.pdf [file 41556_2024_1548_MOESM10_ESM.pdf]

**Figure 3**

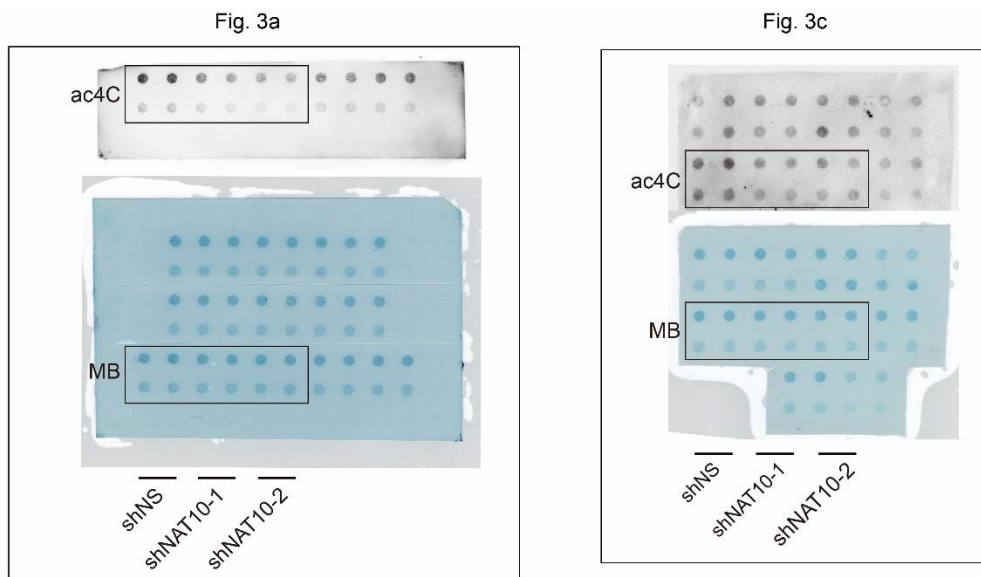

Fig. 3d

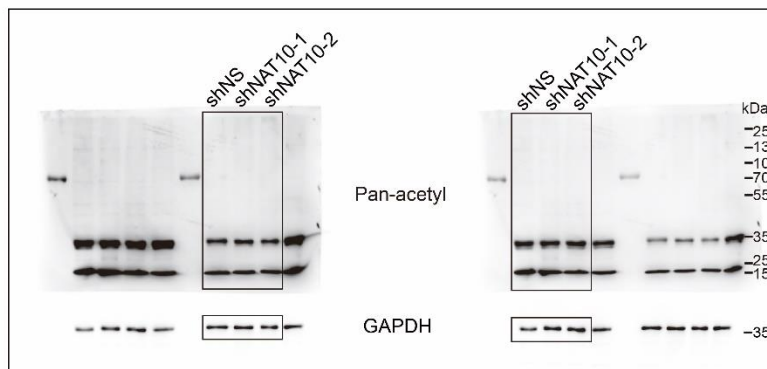

Fig. 3e

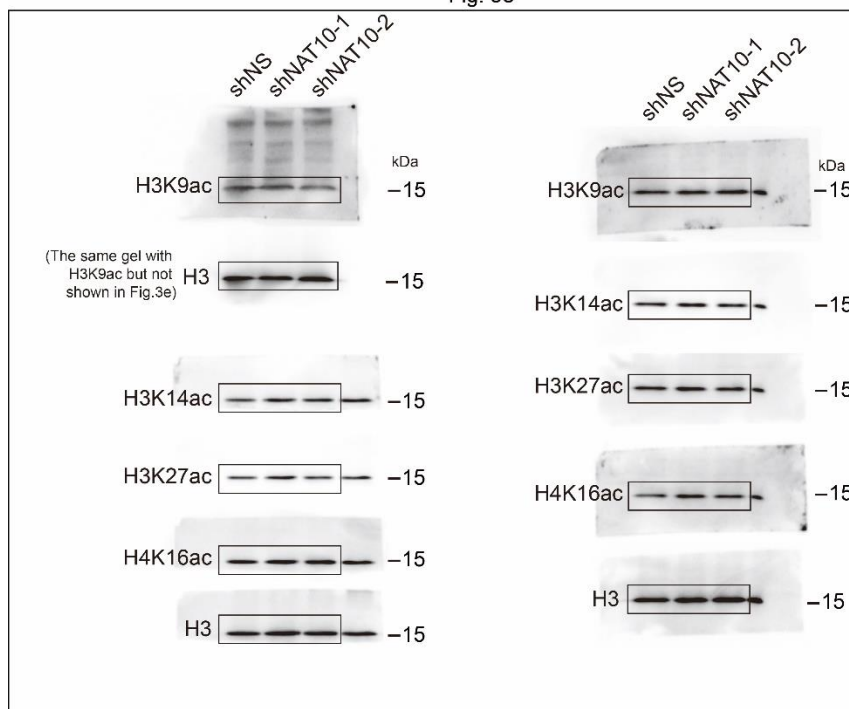

Fig. 3f

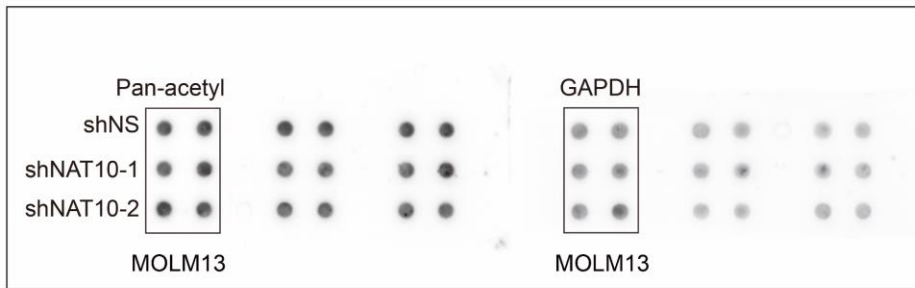

Fig. 3f

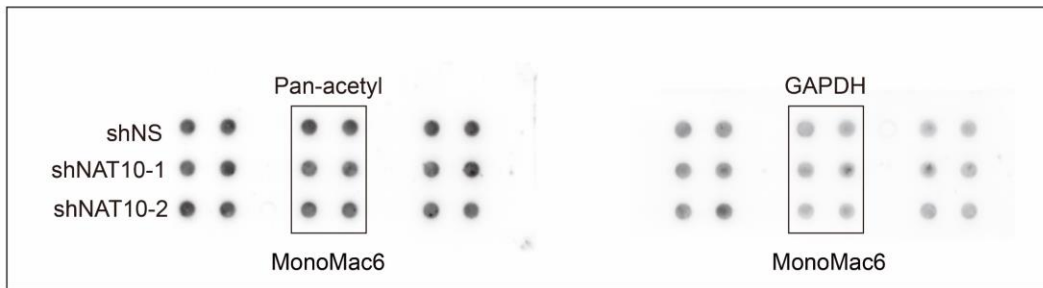

Fig. 3h

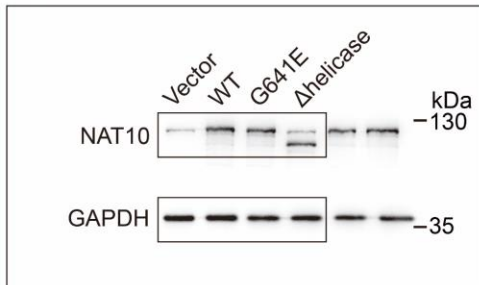

Fig. 3i

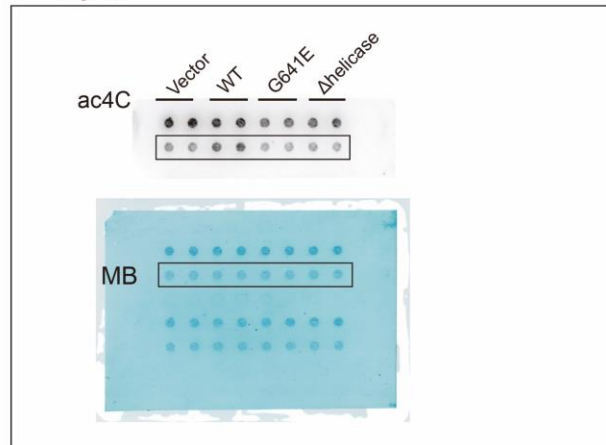

Fig. 3j

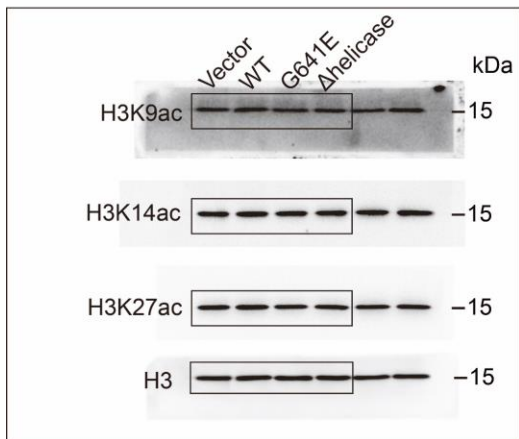

Fig. 3k

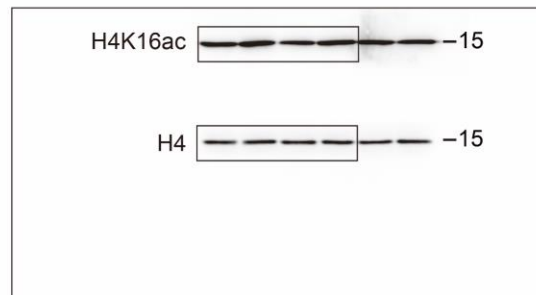

Supplement: 41556_2024_1548_MOESM12_ESM.pdf [file 41556_2024_1548_MOESM12_ESM.pdf]

**Figure 4**

Fig. 4l

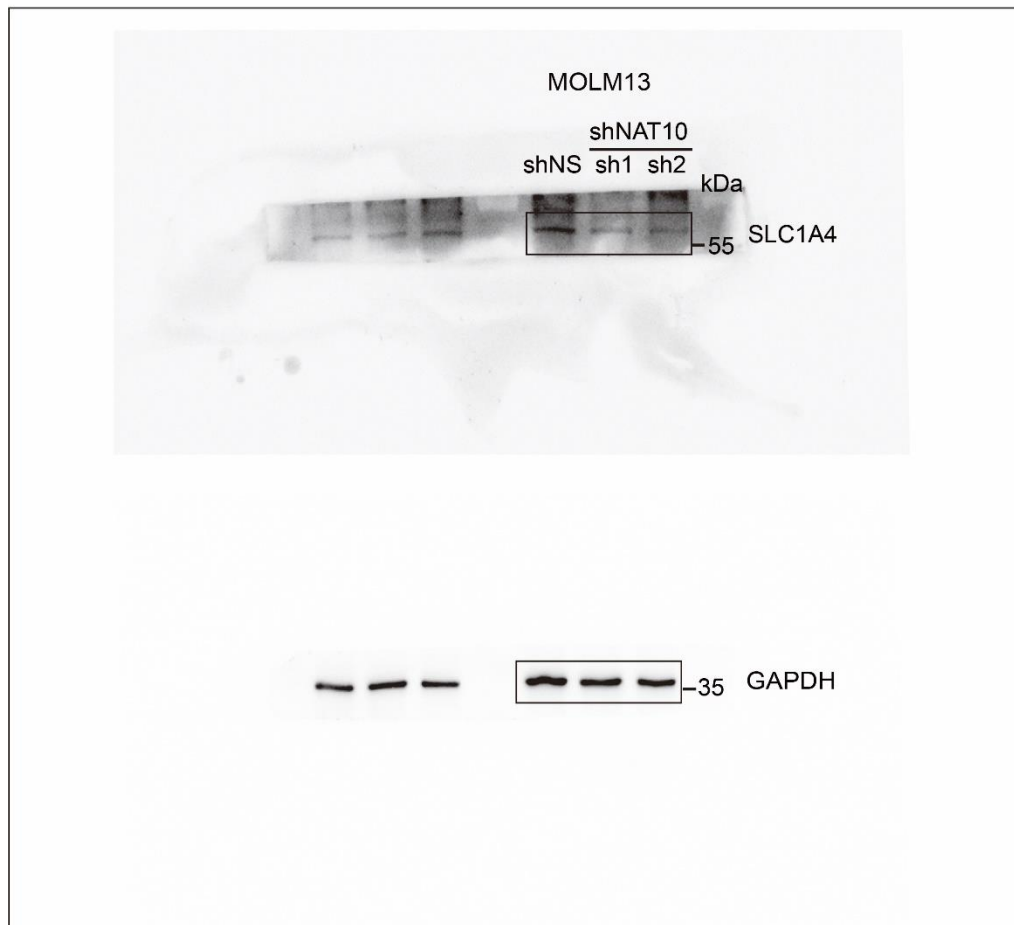

Supplement: 41556_2024_1548_MOESM14_ESM.pdf [file 41556_2024_1548_MOESM14_ESM.pdf]

**Figure 5**

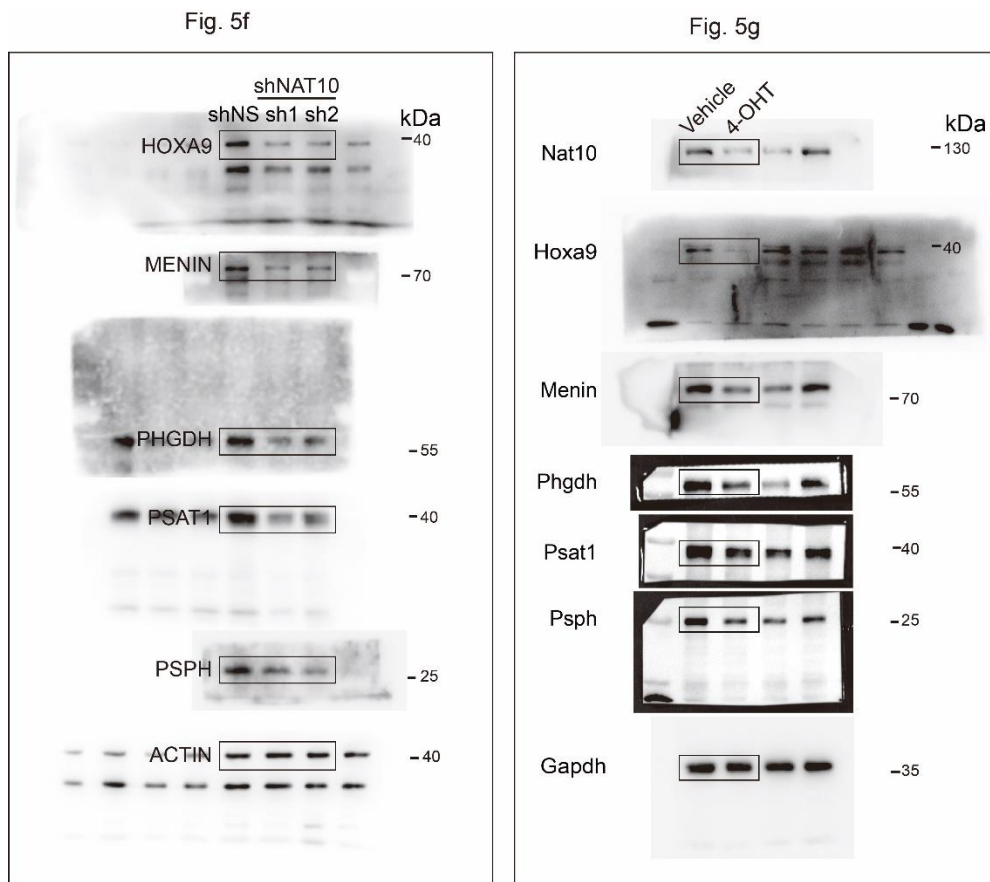

**Fig. 5h**

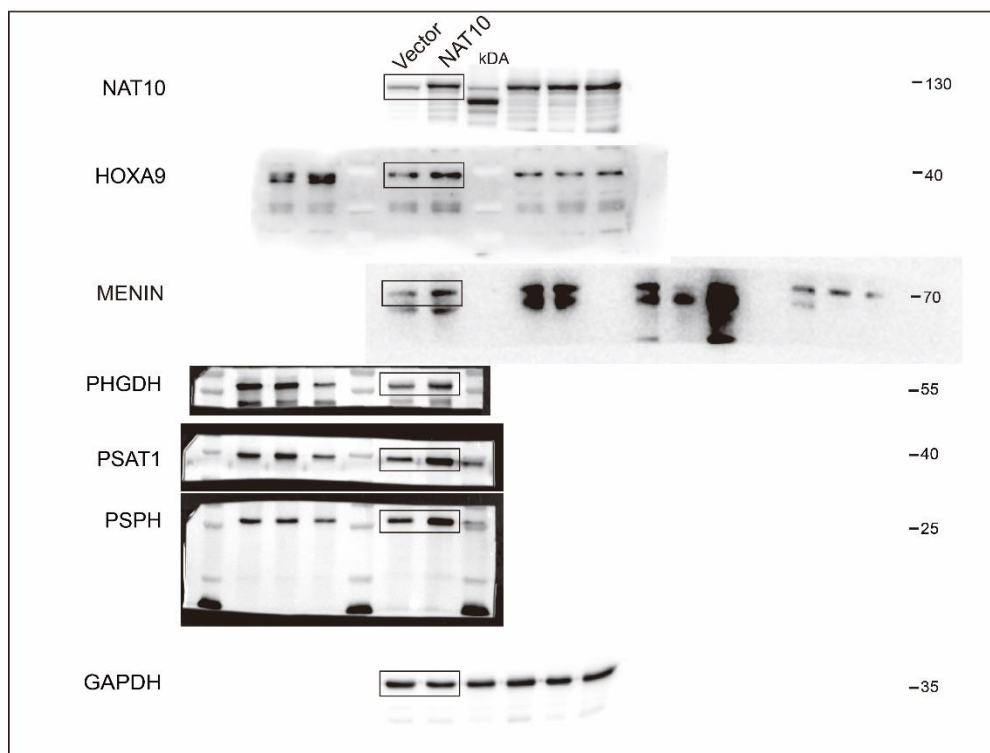

Fig. 5m

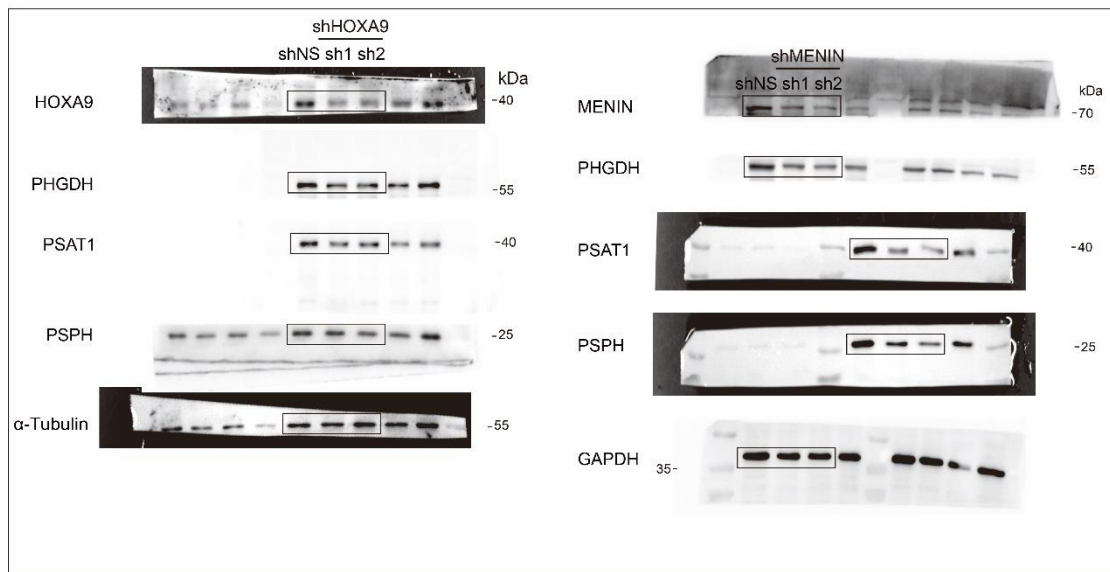

Supplement: 41556_2024_1548_MOESM16_ESM.pdf [file 41556_2024_1548_MOESM16_ESM.pdf]

**Figure 6**

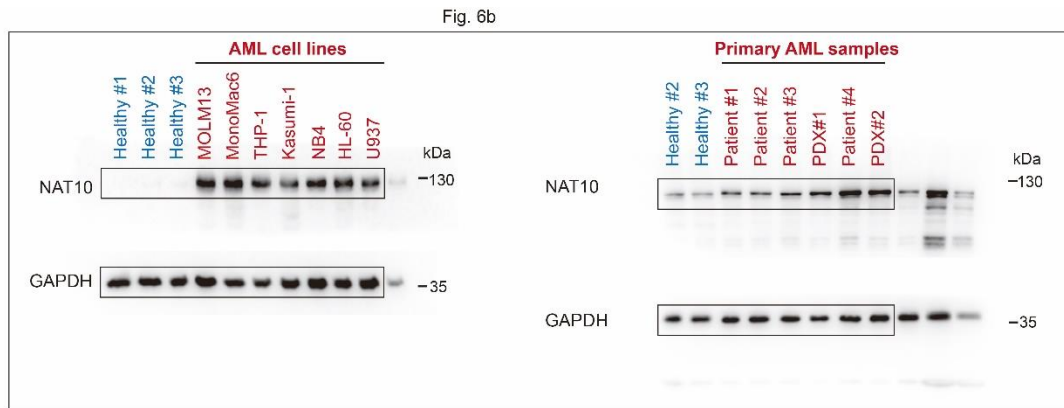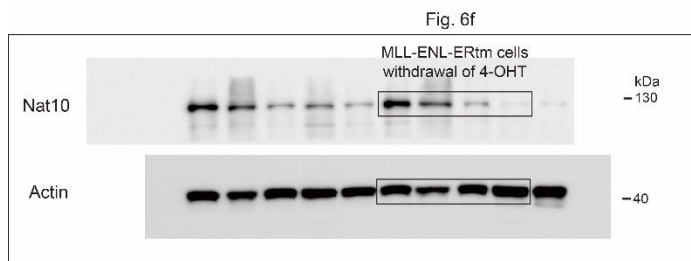

Supplement: 41556_2024_1548_MOESM18_ESM.pdf [file 41556_2024_1548_MOESM18_ESM.pdf]

**Figure 7**

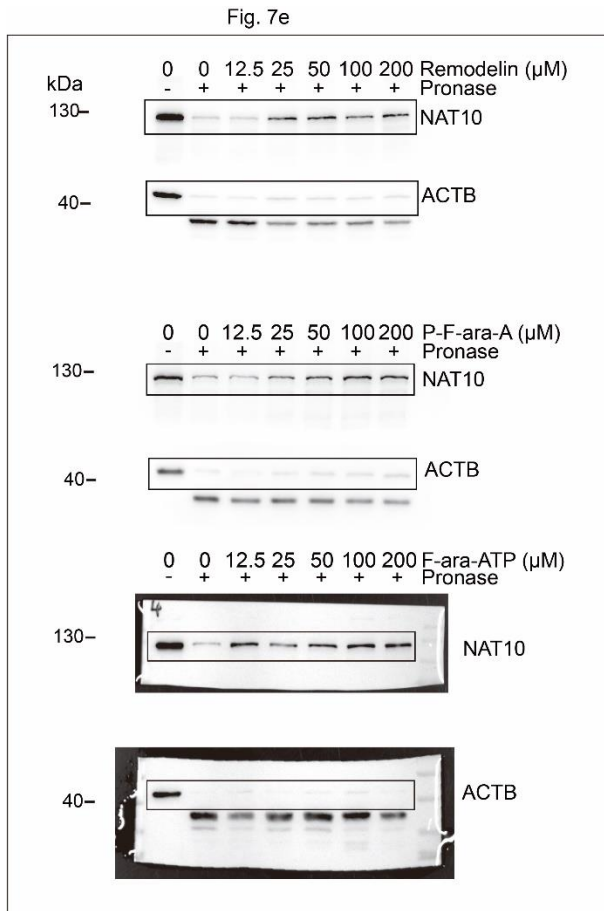

Fig. 7g

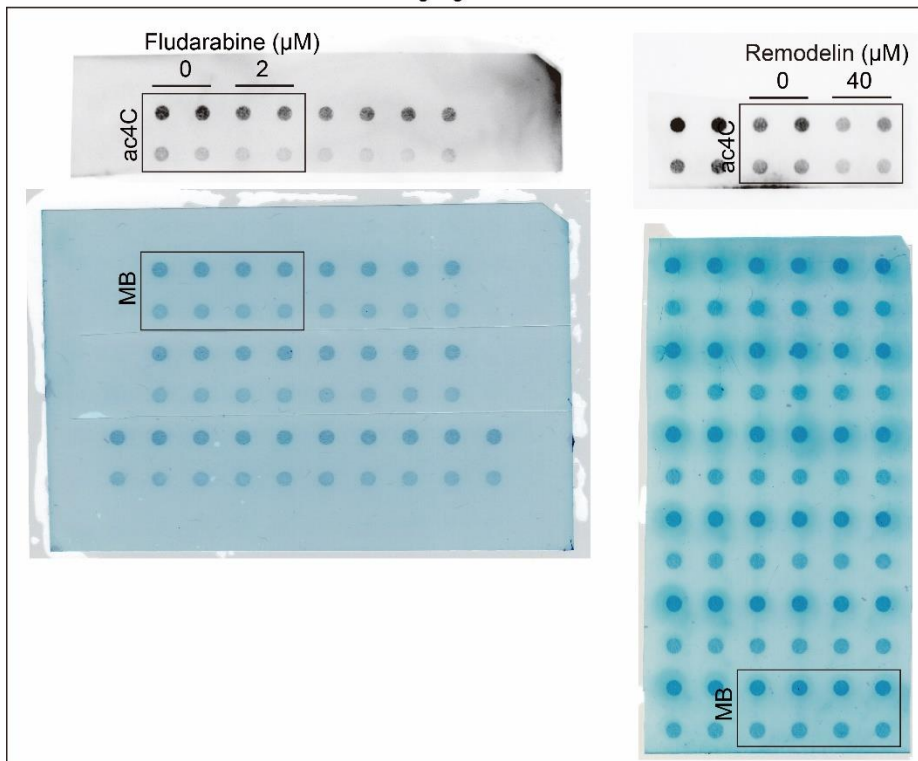

Fig. 7h

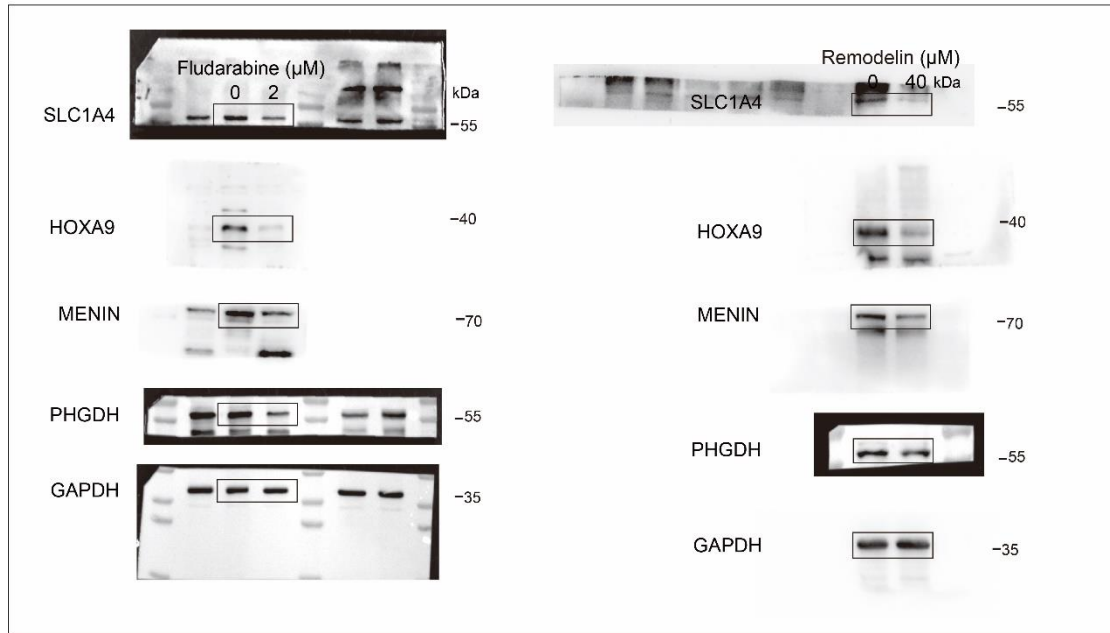

Supplement: 41556_2024_1548_MOESM20_ESM.pdf [file 41556_2024_1548_MOESM20_ESM.pdf]

## Extended Data Figure 1

Extended Data Fig. 1e

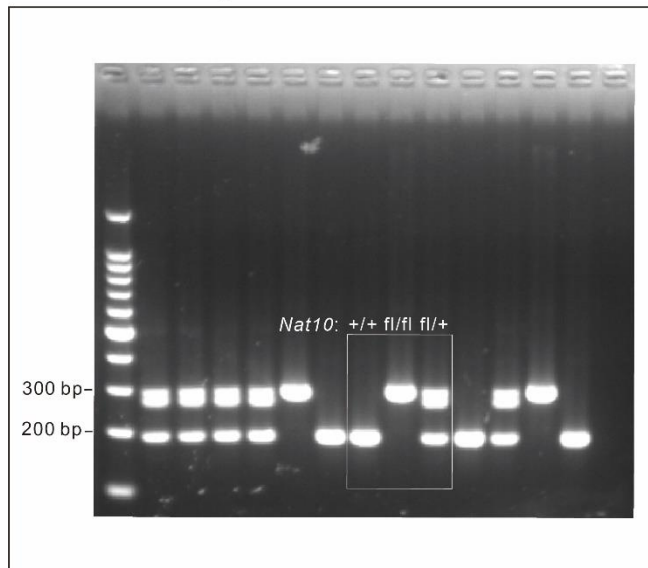

Extended Data Fig. 1f

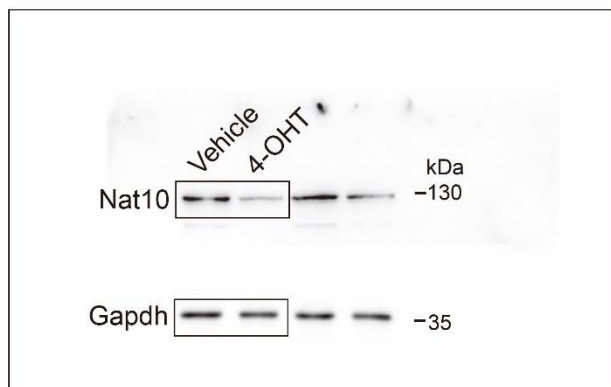

Extended Data Fig. 1g

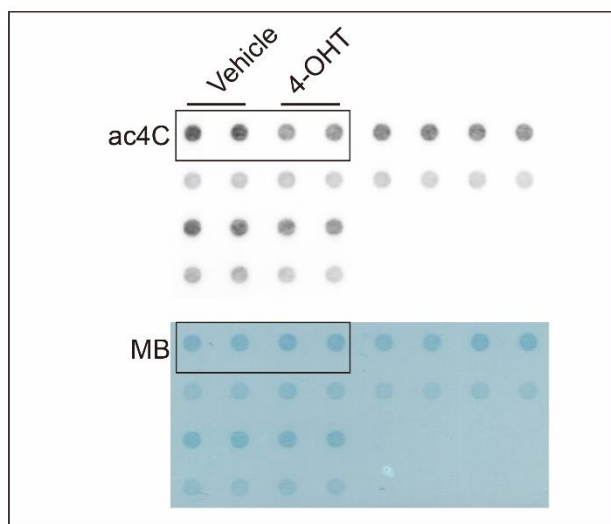

Supplement: 41556_2024_1548_MOESM22_ESM.pdf [file 41556_2024_1548_MOESM22_ESM.pdf]

## Extended Data Figure 2

Extended Data Fig. 2c

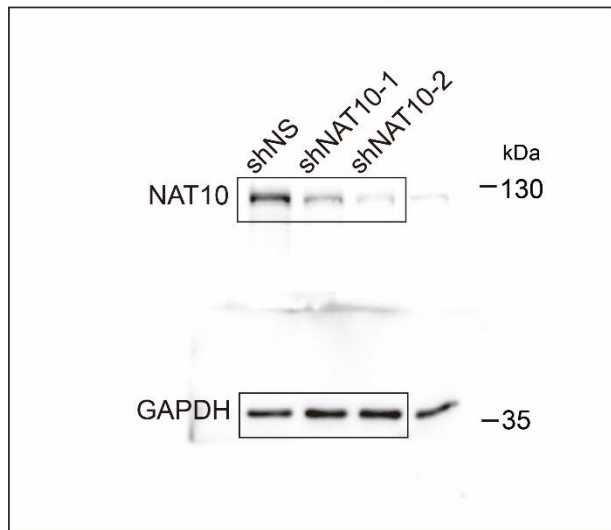

Supplement: 41556_2024_1548_MOESM24_ESM.pdf [file 41556_2024_1548_MOESM24_ESM.pdf]

## Extended Data Figure 4

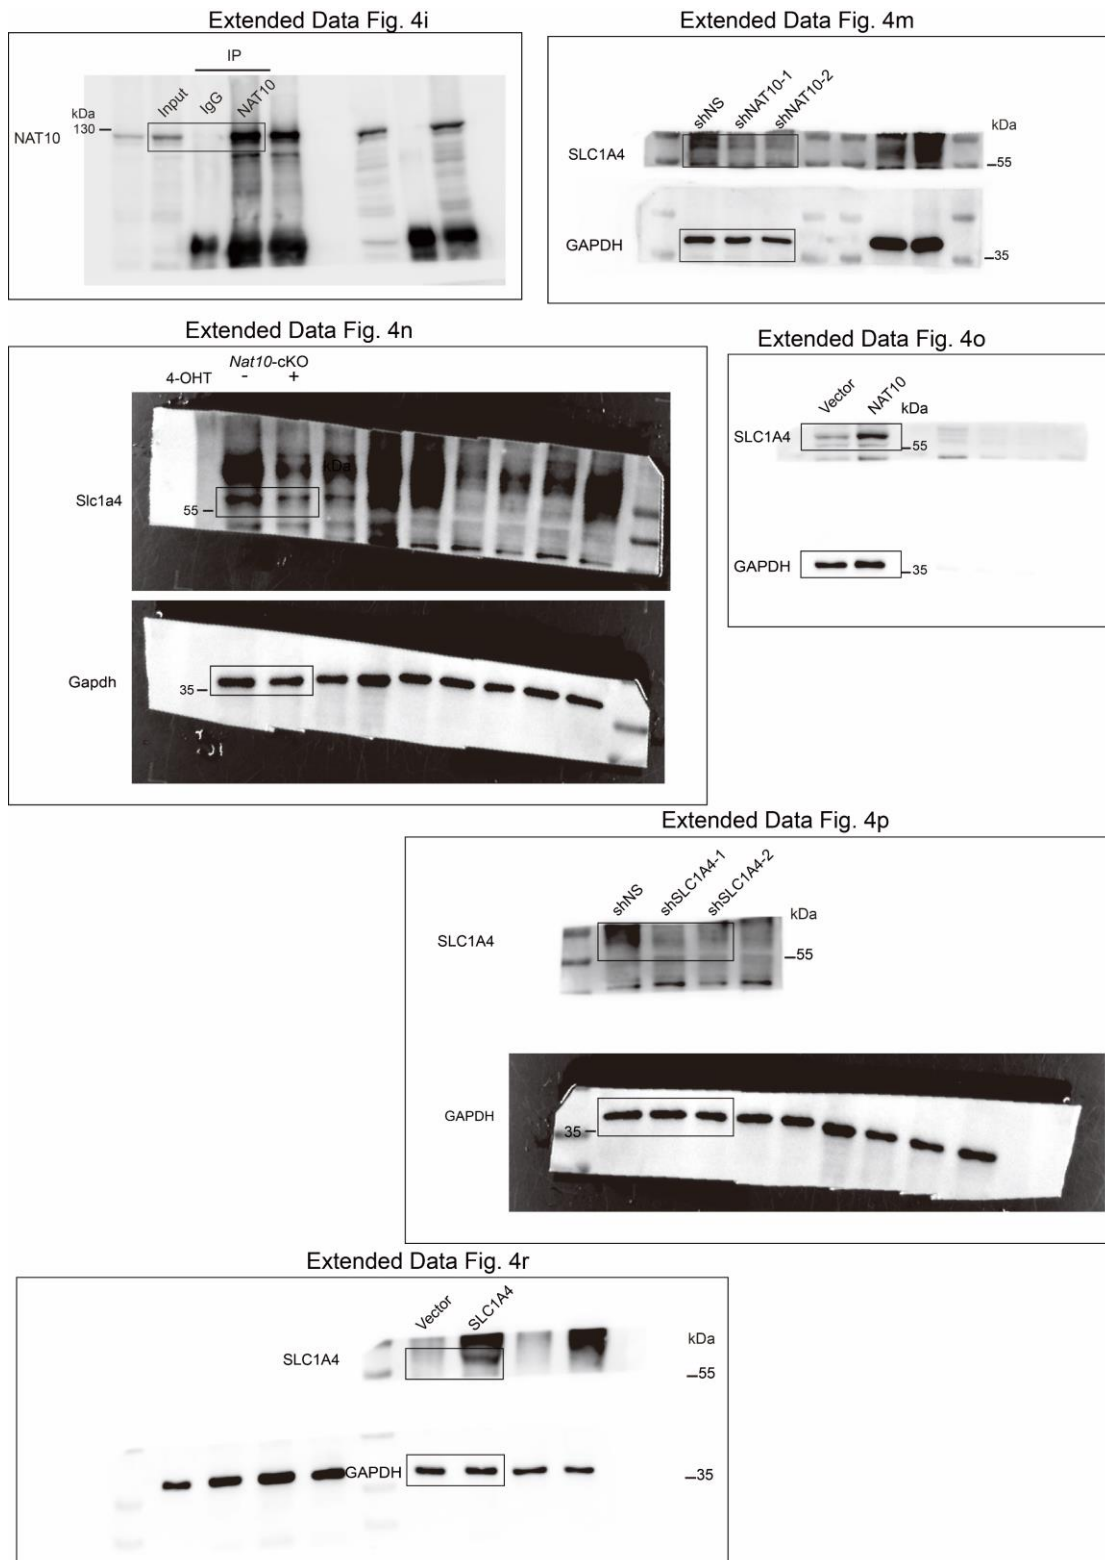

Supplement: 41556_2024_1548_MOESM28_ESM.pdf [file 41556_2024_1548_MOESM28_ESM.pdf]

## Extended Data Figure 5

Extended Data Fig. 5g

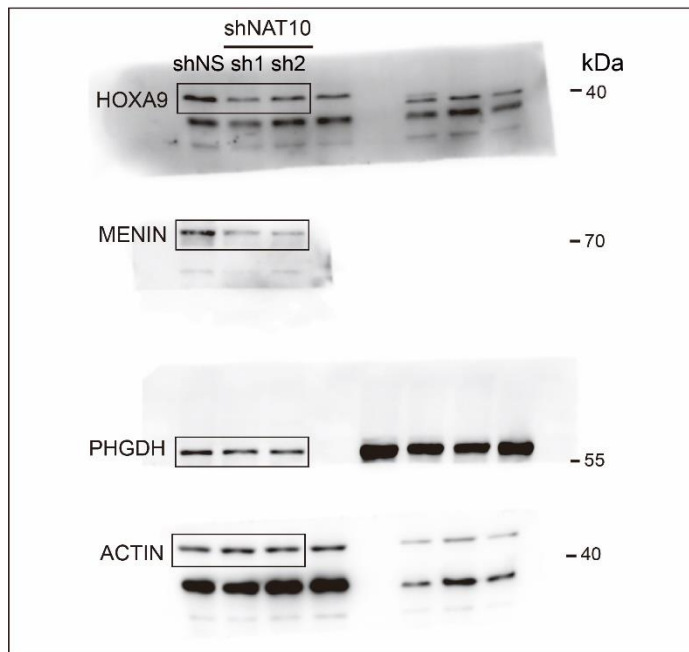

Extended Data Fig. 5m

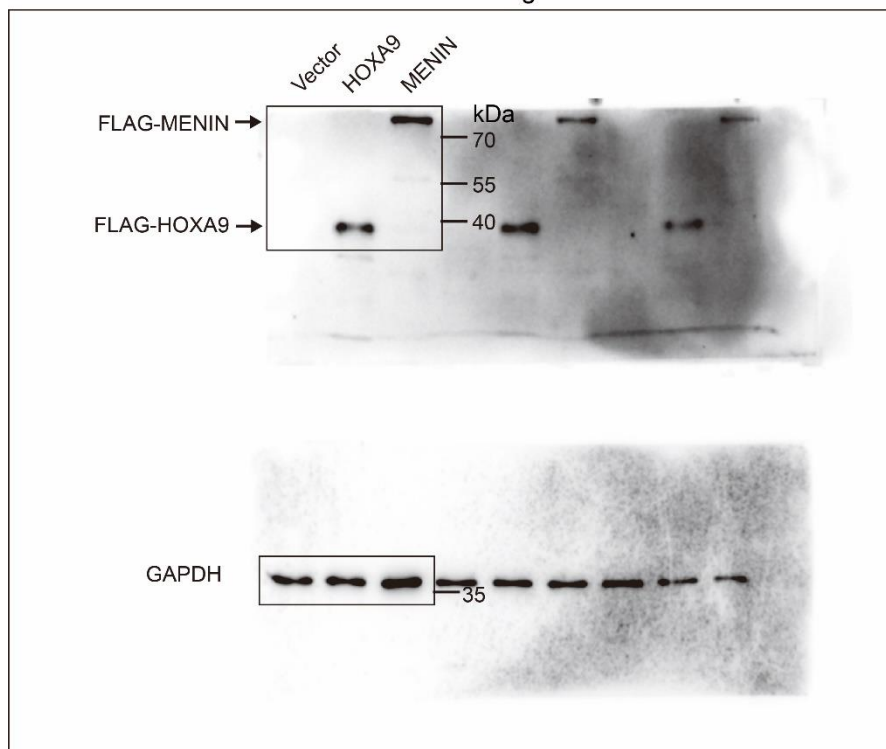

Supplement: 41556_2024_1548_MOESM30_ESM.pdf [file 41556_2024_1548_MOESM30_ESM.pdf]

## Extended Data Figure 7

Extended Data Fig. 7f

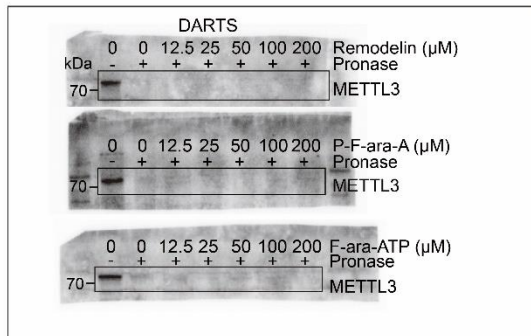

Extended Data Fig. 7g

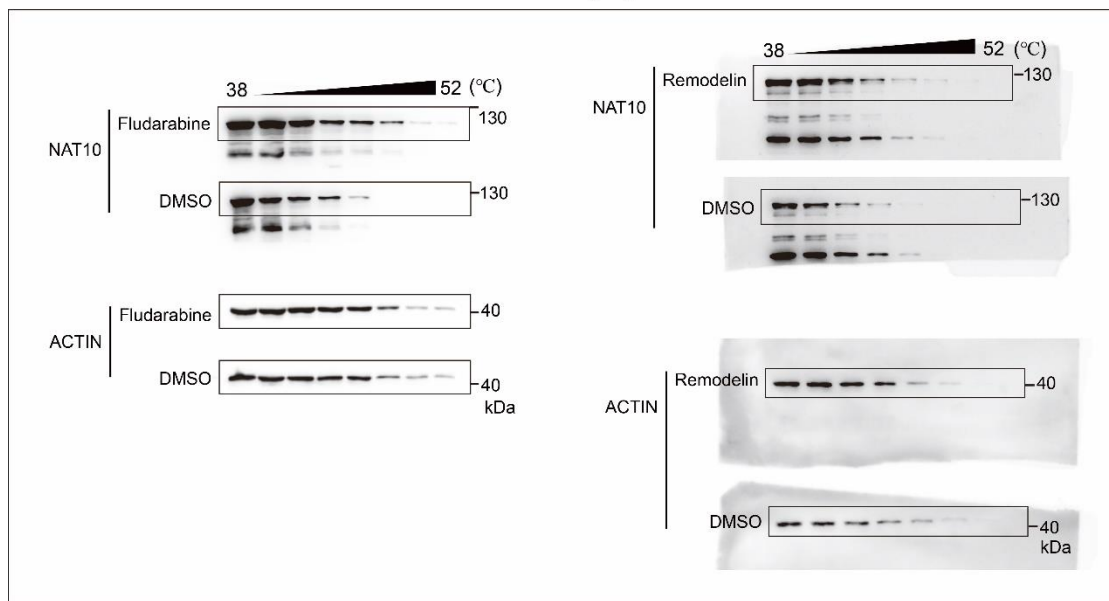

Extended Data Fig. 7m

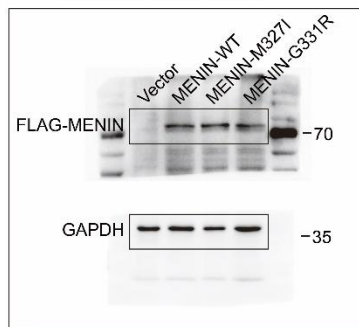

Supplement: 41556_2024_1548_MOESM33_ESM.pdf [file 41556_2024_1548_MOESM33_ESM.pdf]

## Extended Data Figure 8

### Extended Data Fig. 8a

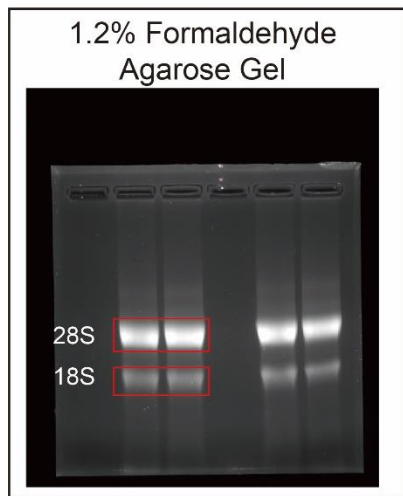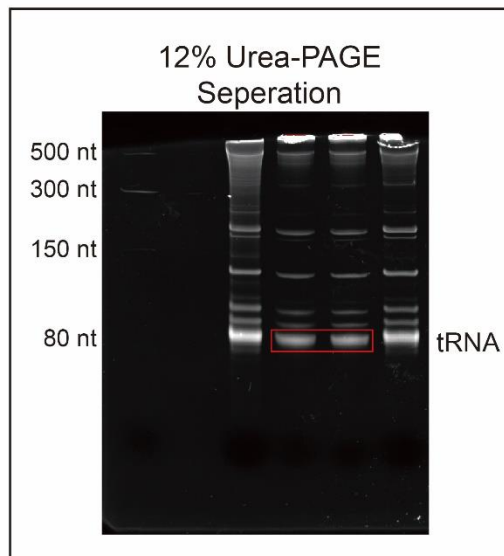

Supplement: 41556_2024_1548_MOESM35_ESM.pdf [file 41556_2024_1548_MOESM35_ESM.pdf]

**Figure 1**

Fig.1e

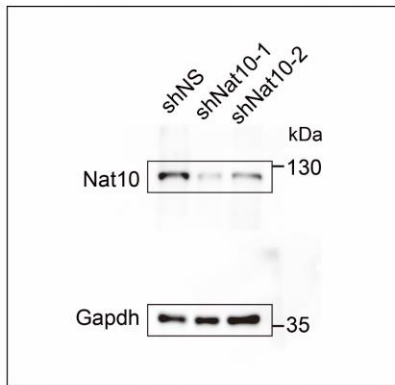

Fig.1f

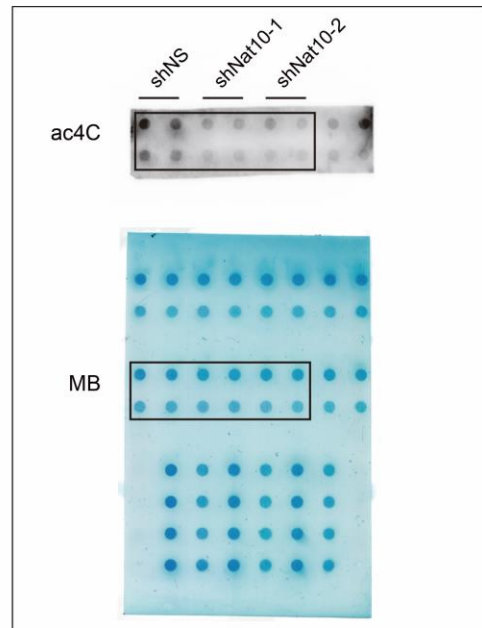

Fig.1j

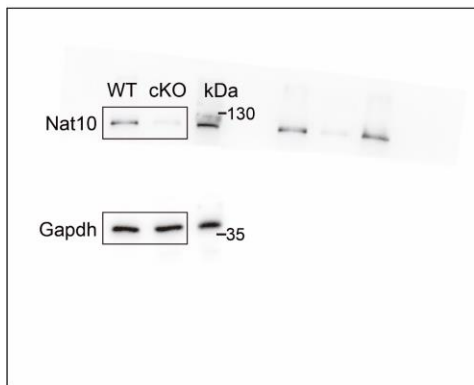

Fig.1k

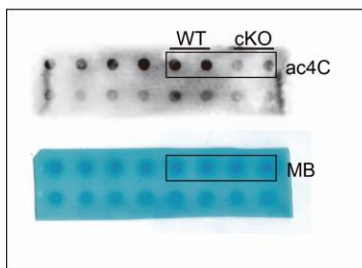

Supplement: 41556_2024_1548_MOESM8_ESM.pdf [file 41556_2024_1548_MOESM8_ESM.pdf]
